# Supplementary material
Source: HighWire-hosted journal article supplement (https://erj.ersjournals.com/content/49/1/1502127)
Supplement: inline-supplementary-material-1 [file inline-supplementary-material-1.pdf]

## Online Supplements

### **Ambient air pollution, traffic noise and adult prevalent asthma: a**

#### **BioSHaRE approach**

Yutong Cai<sup>1</sup>, Wilma L Zijlema<sup>2</sup>, Dany Doiron<sup>3</sup>, Marta Blangiardo<sup>1</sup>, Paul R Burton<sup>4,5</sup>, Isabel Fortier<sup>3</sup>, Amadou Gaye<sup>4,6</sup>, John Gulliver<sup>1</sup>, Kees de Hoogh<sup>1,7,8</sup>, Kristian Hveem<sup>9</sup>, Stéphane Mbatchou<sup>3</sup>, David W Morley<sup>1</sup>, Ronald P Stolk<sup>2</sup>, Paul Elliott<sup>1</sup>, Anna L Hansell<sup>1,10</sup>, Susan Hodgson<sup>1</sup>

1: MRC-PHE Centre for Environment and Health, Department of Epidemiology and Biostatistics, School of Public Health, Imperial College London, London, UK

2: Department of Epidemiology, University of Groningen, University Medical Center Groningen, Groningen, the Netherlands.

3: Research Institute of the McGill University Health Centre and Department of Medicine, McGill University, Montreal, Canada.

4: Data to Knowledge (D2K) Research Group, University of Bristol, Bristol, UK.

5: Public Population Project in Genomics and Society (P<sup>3</sup>G), Montreal, Canada.

6: Metabolic, Cardiovascular and Inflammatory Disease Genomics Branch, National Human Genome Research Institute, Bethesda, USA

7: Swiss Tropical and Public Health Institute, Basel, Switzerland

8: University of Basel, Basel, Switzerland.

9: Department of Public Health and General Practice, Norwegian University of Science and Technology, Trondheim, Norway.

10: Directorate of Public Health and Primary Care, Imperial College Healthcare NHS Trust, London, UK.

#### **Corresponding author:**

Yutong Cai, MRC-PHE Centre for Environment and Health, Department of Epidemiology and Biostatistics, School of Public Health, Imperial College London, St Mary's Campus, Norfolk Place, London, W2 1PG, UK.

E-mail: yutong.cai@imperial.ac.uk

Fax: +44 (0) 20 7594 3193

Phone: + 44 (0) 20 7594 2067

## Supplement-1

### Pan-European LUR model methods

NO<sub>2</sub> and PM<sub>10</sub> annual estimates for the year 2005-2007 were derived from a pan-European LUR model, which was applied on a 100m grid across Western Europe. Annual mean NO<sub>2</sub> and PM<sub>10</sub> data during 2005-2007 were obtained from over 1500 monitoring sites across Europe, regulated and reported by EuroAirnet. Only those monitoring sites which captured over 75% of the total hours for NO<sub>2</sub> and days for PM<sub>10</sub> were included. These monitored air pollution data were served as dependent variables while satellite-based ground-level concentration of NO<sub>2</sub> and PM<sub>2.5</sub> (both on a 10km grid) and GIS-derived land-use and traffic variables were served as independent variables in the LUR modelling.

- NO<sub>2</sub>

GIS-derived variables included in the final NO<sub>2</sub> models for 2005, 2006 and 2007 across countries were highly consistent. Table 1 shows the variables included in the final NO<sub>2</sub> model for the year 2007. For variables included in the final models for year 2005 and 2006 as well as the model equations, please refer to the reference paper (Vienneau, D, 2013).

**Table 1.1** GIS-variables which were included in the final Satellite-enhanced LUR model for NO<sub>2</sub> (year 2007) for HUNT3, LifeLines and UK Biobank

| GIS variable name                 | Sources                                | Description                                                                                              |
|-----------------------------------|----------------------------------------|----------------------------------------------------------------------------------------------------------|
| <b>NO<sub>2</sub> (year 2007)</b> |                                        |                                                                                                          |
| Constant                          |                                        |                                                                                                          |
| Minor roads 1500m                 | Central Road Network: EuroStreets V3.1 | Lengths (metre) of all minor roads within 1500 metre                                                     |
| Major roads 100m                  | Central Road Network: EuroStreets V3.1 | Lengths (metre) of all major roads within 100 metre                                                      |
| Semi-natural land 600m            | CORINE                                 | Semi-natural land (% of area) within a 600 metre buffer                                                  |
| Minor roads 1500-10000m           | Central Road Network: EuroStreets V3.1 | Lengths (metre) of all minor roads within 1500-10,000 metre                                              |
| Total built up land 300m          | CORINE                                 | Total built up, % of area (residential, industrial, port, airports, mines, dumps and construction sites) |

|                                                |                                                                   |                                                                                                |
|------------------------------------------------|-------------------------------------------------------------------|------------------------------------------------------------------------------------------------|
| Satellite-derived surface NO <sub>2</sub> 2007 | OMI (Ozone Monitoring Instrument) derived from the Aura Satellite | Surface NO <sub>2</sub> concentration: OMI derived NO <sub>2</sub> (ppb) ~10km grid resolution |
|------------------------------------------------|-------------------------------------------------------------------|------------------------------------------------------------------------------------------------|

- **PM<sub>10</sub>**

Table 2 shows the variables included in the final PM<sub>10</sub> model for the year 2007. For model equations, please refer to the reference paper (Vienneau, D, 2013).

**Table 1.2** GIS-variables included in the final Satellite-enhanced LUR model for PM<sub>10</sub> (year 2007) for HUNT3, LifeLines and UK Biobank

| GIS variable name                                     | Sources                                | Description                                                                                                                                      |
|-------------------------------------------------------|----------------------------------------|--------------------------------------------------------------------------------------------------------------------------------------------------|
| <b>PM<sub>10</sub> (year 2007)</b>                    |                                        |                                                                                                                                                  |
| Constant                                              |                                        |                                                                                                                                                  |
| Minor roads 200-2500m                                 | Central Road Network: EuroStreets V3.1 | Lengths (metre) of all minor roads from 200-2500 metre                                                                                           |
| Minor roads 200m                                      | Central Road Network: EuroStreets V3.1 | Lengths (metre) of all minor roads within 200 metre                                                                                              |
| Major roads*                                          | Central Road Network: EuroStreets V3.1 | Lengths (metre) of all major roads                                                                                                               |
| Altitude                                              | SRTM Digital Elevation Database V4.1   | Altitude of the geocoded address                                                                                                                 |
| Tree canopy 100m                                      | Coarser Global land cover              | % of area of tree canopy within 100 metre                                                                                                        |
| Y coordinate                                          | GIS database-ArcGIS10                  | Y coordinates for 100m cell centroids                                                                                                            |
| Satellite-derived surface PM <sub>2.5</sub> 2001-2006 | Terra Satellite                        | Surface PM <sub>2.5</sub> concentration: Terra- derived and humidity-corrected PM <sub>2.5</sub> aggregated from 2001-2006 ~10km grid resolution |

\*Buffer not stated in the reference paper

Reference: Vienneau D, de Hoogh K, Bechle MJ, Beelen R, van Donkelaar A, Martin RV, Millet DB, Hoek G, Marshall JD. Western European land use regression incorporating satellite- and ground-based measurements of NO<sub>2</sub> and PM<sub>10</sub>. *Environ Sci Technol* 2013; 47: 13555-13564

## Supplement-2

Table 2.1 Harmonised variables used as covariates in the analysis

| Harmonised name     | Harmonised definition                                                                                                                                             | Unit/Categories                                                                                     |
|---------------------|-------------------------------------------------------------------------------------------------------------------------------------------------------------------|-----------------------------------------------------------------------------------------------------|
| AGE_YRS             | Age of the participant in years<br>(continuous) at recruitment                                                                                                    | Years                                                                                               |
| GENDER              | Sex of the participant                                                                                                                                            | 0: Male; 1:Female                                                                                   |
| ADM_YRINT           | Calendar Year of the interview                                                                                                                                    | calendar year                                                                                       |
| PM_HEIGHT           | Measured height                                                                                                                                                   | cm                                                                                                  |
| PM_WEIGHT           | Measured weight                                                                                                                                                   | kg                                                                                                  |
| PM_BMI_CONTINUOUS   | Body Mass Index: calculated using measured or self-reported weight and height ( $\text{kg/m}^2$ )                                                                 | $\text{kg/m}^2$                                                                                     |
| PM_BMI_CATEGORICAL  | Body Mass Index calculated using measured or self-reported weight and height ( $\text{Mass in Kg} / (\text{Height in metre})^2$ ) and stratified in 3 categories. | 1: less $25 \text{ kg/m}^2$ ;<br>2: 25 to $30 \text{ kg/m}^2$ ;<br>3: over $30 \text{ kg/m}^2$      |
| SMK_STATUS          | Indicator of the participant's current and past smoking status, which includes use of cigarettes, cigars, pipes and other tobacco products.                       | 0: Never-smoker;<br>1: Ex-smoker;<br>2: Current-smoker                                              |
| WORK_STATUS_CURRENT | Indicator of whether the participant is currently in paid employment or is self-employed.                                                                         | 0: No paid employment or not self-employed;<br>1: Paid employment or self-employed                  |
| EDU_HIGHEST_1       | Highest level of education completed by the participant. Categories are adapted from the UNESCO Revision of the                                                   | 0: No education or primary education<br>1: Secondary education;<br>2: Vocational/college/university |

|  |                                                             |  |
|--|-------------------------------------------------------------|--|
|  | International Standard<br>Classification of Education, 2011 |  |
|--|-------------------------------------------------------------|--|

Supplement-3

Table 3.1 Distributions of exposures by cohort and in the pooled data

| <b>NO<sub>2</sub>, µg/m<sup>3</sup></b>  | <b>N</b> | <b>5%</b> | <b>10%</b> | <b>25%</b> | <b>50%</b> | <b>75%</b> | <b>90%</b> | <b>95%</b> | <b>Mean(SD)</b> | <b>IQR</b> |
|------------------------------------------|----------|-----------|------------|------------|------------|------------|------------|------------|-----------------|------------|
| <b>HUNT3</b>                             | 50,628   | 8.2       | 8.8        | 10.1       | 11.9       | 15.4       | 18.6       | 19.5       | 13.0 (3.9)      | 5.3        |
| <b>LifeLines</b>                         | 62,212   | 13.6      | 14.1       | 16.6       | 20.6       | 25.4       | 28.9       | 31.1       | 21.2 (5.7)      | 8.8        |
| <b>UK Biobank</b>                        | 495,262  | 16.7      | 19.2       | 23.6       | 28.9       | 35         | 45.1       | 52.1       | 30.7 (10.7)     | 11.4       |
| <b>Pooled</b>                            | 608,102  | 17        | 19.2       | 23.5       | 28.7       | 34.9       | 44.2       | 50.5       | 28.3 (9.9)      | 11.4       |
| <b>PM<sub>10</sub>, µg/m<sup>3</sup></b> | <b>N</b> | <b>5%</b> | <b>10%</b> | <b>25%</b> | <b>50%</b> | <b>75%</b> | <b>90%</b> | <b>95%</b> | <b>Mean(SD)</b> | <b>IQR</b> |
| <b>HUNT3</b>                             | 50,567   | 9.7       | 10         | 10.4       | 11.2       | 12         | 12.6       | 12.9       | 11.3 (1.1)      | 1.6        |
| <b>LifeLines</b>                         | 61,927   | 21        | 21.4       | 22.3       | 23.6       | 24.7       | 25.7       | 26.5       | 23.6 (1.7)      | 2.4        |
| <b>UK Biobank</b>                        | 494,163  | 17.7      | 18.7       | 20.2       | 21.8       | 23.6       | 26         | 27.5       | 22.1 (2.9)      | 3.4        |
| <b>Pooled</b>                            | 606,657  | 19.3      | 20.2       | 21.6       | 23.3       | 25         | 27.2       | 28.6       | 21.3 (2.7)      | 3.4        |
| <b>LDAY, dB(A)</b>                       | <b>N</b> | <b>5%</b> | <b>10%</b> | <b>25%</b> | <b>50%</b> | <b>75%</b> | <b>90%</b> | <b>95%</b> | <b>Mean(SD)</b> | <b>IQR</b> |
| <b>HUNT3</b>                             | 45,644   | 39.1      | 39.5       | 43.6       | 47.4       | 50.3       | 52.9       | 54.6       | 47.0 (4.9)      | 6.7        |
| <b>LifeLines</b>                         | 74,744   | 51.3      | 51.7       | 52.4       | 53.9       | 56.6       | 60.4       | 63.9       | 55.2 (4.0)      | 4.2        |
| <b>UK Biobank</b>                        | 495,262  | 51.1      | 51.4       | 52.9       | 54.3       | 56.4       | 60.6       | 66         | 55.4 (4.3)      | 3.5        |
| <b>Pooled</b>                            | 615,650  | 54.7      | 55.1       | 56.9       | 58.8       | 61.2       | 65.6       | 70.8       | 54.8 (4.3)      | 4.3        |
| <b>LNIGHT, dB(A)</b>                     | <b>N</b> | <b>5%</b> | <b>10%</b> | <b>25%</b> | <b>50%</b> | <b>75%</b> | <b>90%</b> | <b>95%</b> | <b>Mean(SD)</b> | <b>IQR</b> |
| <b>HUNT3</b>                             | 45,644   | 35.1      | 35.2       | 37.5       | 40.2       | 42.5       | 44.8       | 46.4       | 40.3 (3.7)      | 5          |
| <b>LifeLines</b>                         | 74,744   | 42.5      | 42.8       | 43.6       | 45.1       | 47.8       | 51.6       | 55.1       | 46.4 (4.0)      | 4.2        |
| <b>UK Biobank</b>                        | 495,262  | 42.3      | 42.6       | 44         | 45.5       | 47.5       | 51.8       | 57.2       | 46.6 (4.3)      | 3.5        |
| <b>Pooled</b>                            | 615,650  | 45.6      | 46         | 47.5       | 49.3       | 51.7       | 56.1       | 61.2       | 46.1 (4.2)      | 4.2        |

NO<sub>2</sub> AND PM<sub>10</sub> were estimated based on the pan-European satellite-enhanced LUR model for year 2007 while noise estimates (LDAY and LNIGHT) were for year 2009

Supplement-4

Table 4.1 Spearman correlations between air pollutants and day-time noise (Lday) by cohort

| <b>HUNT3 (N=45581)</b>        | NO <sub>2</sub> | PM <sub>10</sub> | Lday                    |                          |      |
|-------------------------------|-----------------|------------------|-------------------------|--------------------------|------|
| NO <sub>2</sub>               | -               |                  |                         |                          |      |
| PM <sub>10</sub>              | 0.80            | -                |                         |                          |      |
| Lday                          | <b>-0.05</b>    | <b>0.04</b>      | -                       |                          |      |
|                               |                 |                  |                         |                          |      |
| <b>LifeLines (N=62653)</b>    | NO <sub>2</sub> | PM <sub>10</sub> | NO <sub>2</sub> _ESCAPE | PM <sub>10</sub> _ESCAPE | Lday |
| NO <sub>2</sub>               | -               |                  |                         |                          |      |
| PM <sub>10</sub>              | 0.78            | -                |                         |                          |      |
| NO <sub>2</sub> _ESCAPE       | 0.86            | 0.78             | -                       |                          |      |
| PM <sub>10</sub> _ESCAPE      | 0.67            | 0.54             | 0.73                    | -                        |      |
| Lday                          | <b>0.43</b>     | <b>0.38</b>      | 0.56                    | 0.57                     | -    |
|                               |                 |                  |                         |                          |      |
| <b>UK Biobank (N=460,240)</b> | NO <sub>2</sub> | PM <sub>10</sub> | NO <sub>2</sub> _ESCAPE | PM <sub>10</sub> _ESCAPE | Lday |
| NO <sub>2</sub>               | -               |                  |                         |                          |      |
| PM <sub>10</sub>              | 0.77            | -                |                         |                          |      |
| NO <sub>2</sub> _ESCAPE       | 0.86            | 0.66             | -                       |                          |      |
| PM <sub>10</sub> _ESCAPE      | 0.5             | 0.42             | 0.54                    | -                        |      |
| Lday                          | <b>0.11</b>     | <b>0.11</b>      | 0.23                    | 0.22                     | -    |

Correlation between Lday and Lnight (r=0.99) in each cohort.

NO<sub>2</sub>: pan-European LUR modelled NO<sub>2</sub> for year 2007

PM<sub>10</sub>: pan-European LUR modelled PM<sub>10</sub> for year 2007

NO<sub>2</sub>\_ESCAPE: ESCAPE LUR modelled NO<sub>2</sub> for year 2010

PM<sub>10</sub>\_ESCAPE: ESCAPE LUR modelled PM<sub>10</sub> for year 2010

## Supplement-5

Table 5.1 Associations (Odds ratio, 95%CI) between traffic noise and asthma prevalence: pooled individual-level analyses from three cohorts

|                                | Day-time noise<br>per 5 dB(A)  |                               | Night-time noise<br>per 5 dB(A) |                               |
|--------------------------------|--------------------------------|-------------------------------|---------------------------------|-------------------------------|
|                                | Ever-had asthma<br>(n=613,362) | Current asthma<br>(n=606,137) | Ever-had asthma<br>(n=613,362)  | Current asthma<br>(n=606,137) |
| <b>Model 1</b>                 | 1.005<br>(0.996 to 1.014)      | 1.000<br>(0.986 to 1.015)     | 1.005<br>(0.996 to 1.015)       | 1.001<br>(0.986 to 1.016)     |
| <b>Model 2</b>                 | 1.002<br>(0.993 to 1.011)      | 0.999<br>(0.985 to 1.014)     | 1.002<br>(0.993 to 1.012)       | 1.000<br>(0.985 to 1.015)     |
| <b>Model 3</b>                 | 0.998<br>(0.988 to 1.008)      | 0.994<br>(0.979 to 1.009)     | 0.999<br>(0.989 to 1.009)       | 0.995<br>(0.979 to 1.010)     |
| <b>Model 3+NO<sub>2</sub></b>  | 0.996<br>(0.987 to 1.006)      | 0.997<br>(0.982 to 1.013)     | 0.997<br>(0.987 to 1.007)       | 0.998<br>(0.983 to 1.014)     |
| <b>Model 3+PM<sub>10</sub></b> | 0.994<br>(0.984 to 1.004)      | 0.992<br>(0.977 to 1.008)     | 0.995<br>(0.985 to 1.005)       | 0.993<br>(0.977 to 1.009)     |

Model1: adjusted for study; Model 2: adjusted for study, sex, age; Model 3: further adjusted for education, employment status, smoking status and body mass index.

# Supplement-6

Table 6.1 Subgroup analyses on Model 3: Associations between pan-European LUR NO<sub>2</sub>, PM<sub>10</sub> and ever-asthma prevalence

|                              | <b>NO<sub>2</sub>,<br/>per 10 µg/m<sup>3</sup></b> |                           | <b>PM<sub>10</sub>,<br/>per 10 µg/m<sup>3</sup></b> |                           |
|------------------------------|----------------------------------------------------|---------------------------|-----------------------------------------------------|---------------------------|
|                              | N                                                  | Ever-had asthma           | N                                                   | Ever-had asthma           |
| <b>Sex</b>                   |                                                    |                           |                                                     |                           |
| men                          | 256,230                                            | 1.020<br>(1.007 to 1.033) | 255,655                                             | 1.131<br>(1.079 to 1.185) |
| women                        | 311,255                                            | 1.017<br>(1.006 to 1.029) | 310,520                                             | 1.120<br>(1.076 to 1.166) |
| P (interaction)              |                                                    | 0.05                      |                                                     | 0.18                      |
| <b>Age</b>                   |                                                    |                           |                                                     |                           |
| <50 years                    | 161,982                                            | 0.995<br>(0.980 to 1.010) | 161,636                                             | 1.057<br>(1.000 to 1.119) |
| ≥50 years                    | 405,503                                            | 1.028<br>(1.018 to 1.038) | 404,539                                             | 1.151<br>(1.110 to 1.193) |
| P (interaction)              |                                                    | 0.13                      |                                                     | 0.01                      |
| <b>Smoking</b>               |                                                    |                           |                                                     |                           |
| never-smoker                 | 301,380                                            | 1.003<br>(0.991 to 1.014) | 300,698                                             | 1.073<br>(1.029 to 1.118) |
| ex-smoker                    | 195,190                                            | 1.032<br>(1.018 to 1.047) | 194,724                                             | 1.166<br>(1.108 to 1.227) |
| current-smoker               | 70,915                                             | 1.053<br>(1.028 to 1.078) | 70,753                                              | 1.290<br>(1.178 to 1.413) |
| P (interaction)              |                                                    | 0.52                      |                                                     | 0.00                      |
| <b>BMI, kg/m<sup>2</sup></b> |                                                    |                           |                                                     |                           |
| <25                          | 194,806                                            | 1.015<br>(1.001 to 1.029) | 194,412                                             | 1.129<br>(1.071 to 1.190) |
| 25-30                        | 240,402                                            | 1.016<br>(1.002 to 1.029) | 239,827                                             | 1.122<br>(1.069 to 1.177) |
| ≥30                          | 132,277                                            | 1.021<br>(1.005 to 1.038) | 131,936                                             | 1.103<br>(1.040 to 1.170) |
| P (interaction)              |                                                    | 0.61                      |                                                     | 0.23                      |
| <b>Education</b>             |                                                    |                           |                                                     |                           |
| primary school or less       | 93,026                                             | 1.047<br>(1.024 to 1.070) | 92,814                                              | 1.195<br>(1.106 to 1.294) |

|                                |         |                           |         |                           |
|--------------------------------|---------|---------------------------|---------|---------------------------|
| secondary school               | 160,498 | 1.035<br>(1.017 to 1.054) | 160,085 | 1.227<br>(1.147 to 1.311) |
| post-secondary school or above | 313,961 | 1.009<br>(0.999 to 1.019) | 313,276 | 1.085<br>(1.044 to 1.126) |
| P (interaction)                |         | 0.53                      |         | 0.00                      |

Table 6.2 Subgroup analyses on Model 3: Associations between pan-European LUR NO<sub>2</sub>, PM<sub>10</sub> and current-asthma prevalence

|                        | <b>NO<sub>2</sub>,<br/>per 10 µg/m<sup>3</sup></b> |                           | <b>PM<sub>10</sub>,<br/>per 10 µg/m<sup>3</sup></b> |                           |
|------------------------|----------------------------------------------------|---------------------------|-----------------------------------------------------|---------------------------|
|                        | N                                                  | Ever-had asthma           | N                                                   | Ever-had asthma           |
| Sex                    |                                                    |                           |                                                     |                           |
| men                    | 252,503                                            | 0.992<br>(0.970 to 1.013) | 251,933                                             | 1.087<br>(1.004 to 1.177) |
| women                  | 308,040                                            | 0.984<br>(0.967 to 1.002) | 307,312                                             | 1.044<br>(0.979 to 1.114) |
| P (interaction)        |                                                    | 0.53                      |                                                     | 0.27                      |
| Age                    |                                                    |                           |                                                     |                           |
| <50 years              | 159,102                                            | 0.961<br>(0.937 to 0.986) | 158,758                                             | 1.016<br>(0.927 to 1.114) |
| ≥50 years              | 401,441                                            | 0.996<br>(0.980 to 1.013) | 400,487                                             | 1.071<br>(1.009 to 1.137) |
| P (interaction)        |                                                    | 0.50                      |                                                     | 0.00                      |
| Smoking                |                                                    |                           |                                                     |                           |
| never-smoker           | 297,210                                            | 0.956<br>(0.937 to 0.973) | 296,537                                             | 0.962<br>(0.898 to 1.031) |
| ex-smoker              | 193,028                                            | 1.023<br>(1.000 to 1.046) | 192,575                                             | 1.175<br>(1.080 to 1.278) |
| current-smoker         | 70,295                                             | 1.022<br>(0.983 to 1.062) | 70,133                                              | 1.231<br>(1.064 to 1.424) |
| P (interaction)        |                                                    | 0.34                      |                                                     | 0.00                      |
| BMI, kg/m <sup>2</sup> |                                                    |                           |                                                     |                           |
| <25                    | 192,194                                            | 0.981<br>(0.958 to 1.005) | 191,806                                             | 1.036<br>(0.948 to 1.131) |
| 25-30                  | 237,402                                            | 0.972<br>(0.951 to 0.994) | 236,830                                             | 1.045<br>(0.964 to 1.133) |

|                                |         |                           |         |                           |
|--------------------------------|---------|---------------------------|---------|---------------------------|
| >=30                           | 130,947 | 1.010<br>(0.985 to 1.036) | 130,609 | 1.096<br>(0.998 to 1.203) |
| P (interaction)                |         | 0.33                      |         | 0.24                      |
| Education                      |         |                           |         |                           |
| primary school or less         | 92,476  | 1.018<br>(0.983 to 1.055) | 92,265  | 1.118<br>(0.988 to 1.267) |
| secondary school               | 159,132 | 1.028<br>(0.998 to 1.058) | 158,722 | 1.205<br>(1.083 to 1.341) |
| post-secondary school or above | 308,935 | 0.968<br>(0.951 to 0.985) | 308258  | 1.004<br>(0.943 to 1.071) |
| P (interaction)                |         | 0.30                      |         | 0.00                      |

## Supplement-7

Table 7.1 Sensitivity analyses: restricting analyses to those living at the same address for more than 10 years, adjusting for study, age, sex, BMI, smoking, education, employment status.

| <b>NO<sub>2</sub>, per 10 µg/m<sup>3</sup></b> |                           |         |                           | <b>PM<sub>10</sub>, per 10 µg/m<sup>3</sup></b> |                           |         |                           |
|------------------------------------------------|---------------------------|---------|---------------------------|-------------------------------------------------|---------------------------|---------|---------------------------|
| N                                              | Ever-had asthma           | N       | Current asthma            | N                                               | Ever-had asthma           | N       | Current asthma            |
| 376,191                                        | 1.026<br>(1.015 to 1.037) | 371,969 | 0.988<br>(0.971 to 1.005) | 375,387                                         | 1.163<br>(1.120 to 1.208) | 371,174 | 1.074<br>(1.009 to 1.143) |
| <b>Day-time noise, per 5 dB(A)</b>             |                           |         |                           | <b>Night-time noise, per 5 dB(A)</b>            |                           |         |                           |
| N                                              | Ever-had asthma           | N       | Current asthma            | N                                               | Ever-had asthma           | N       | Current asthma            |
| 379,794                                        | 1.005<br>(0.993 to 1.018) | 375,572 | 1.007<br>(0.988 to 1.026) | 379,794                                         | 1.006<br>(0.993 to 1.019) | 375,572 | 1.009<br>(0.988 to 1.028) |

Table 7.2 Sensitivity analyses: Using ESCAPE-LUR modelled NO<sub>2</sub> and PM<sub>10</sub> for LifeLines and UK Biobank and pan-European LUR modelled NO<sub>2</sub> and PM<sub>10</sub> for HUNT3 in the pooled analyses, adjusting for study, age, sex, BMI, smoking, education, employment status.

| <b>NO<sub>2</sub>, per 10 µg/m<sup>3</sup></b> |                           |         |                           | <b>PM<sub>10</sub>, per 10 µg/m<sup>3</sup></b> |                           |         |                           |
|------------------------------------------------|---------------------------|---------|---------------------------|-------------------------------------------------|---------------------------|---------|---------------------------|
| N                                              | Ever-had asthma           | N       | Current asthma            | N                                               | Ever-had asthma           | N       | Current asthma            |
| 567,485                                        | 1.023<br>(1.011 to 1.035) | 560,543 | 1.019<br>(1.000 to 1.038) | 534,347                                         | 1.071<br>(1.021 to 1.123) | 527,733 | 1.114<br>(1.030 to 1.204) |

Supplementary Figure S1

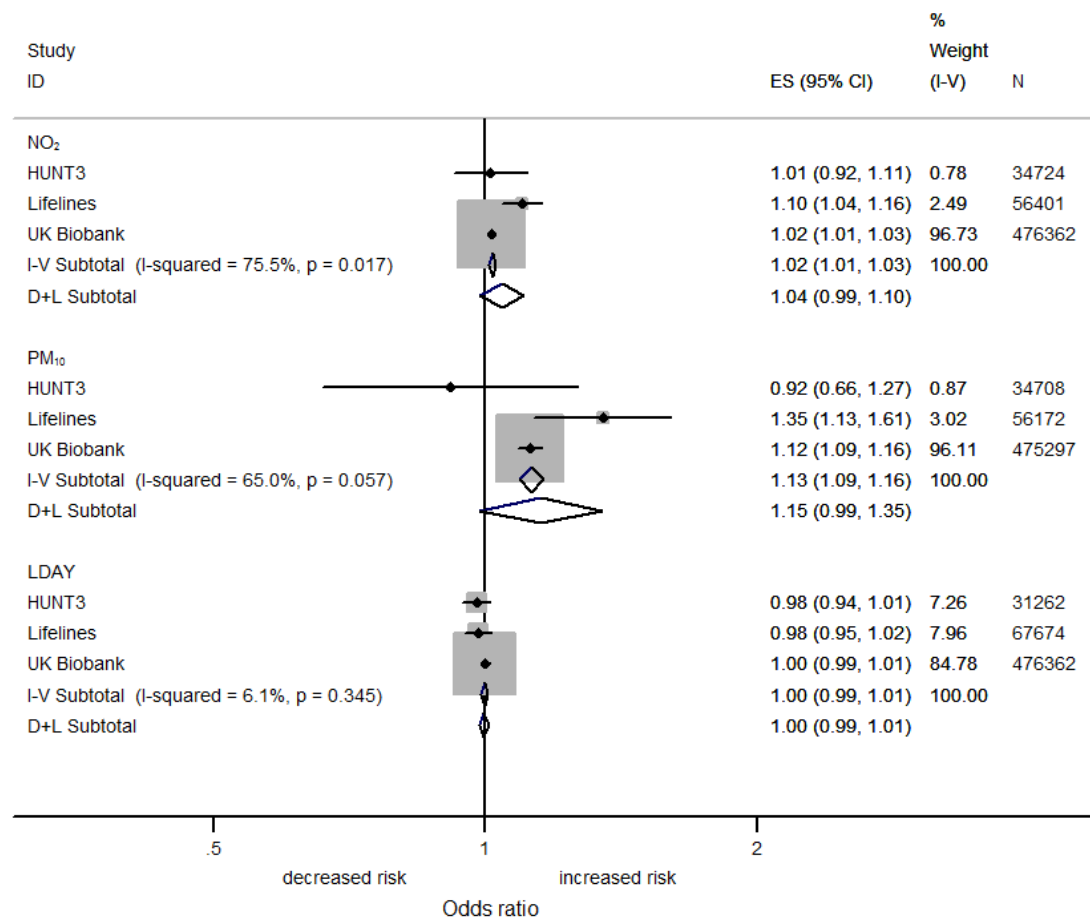

Supplementary Figure S1 Associations between pan-European LUR NO<sub>2</sub> (per 10 µg/m<sup>3</sup>), PM<sub>10</sub> (per 10 µg/m<sup>3</sup>), daytime noise (LDAY, per 5 dB(A)) and **ever-had asthma prevalence**: study-specific meta-analyses based on model 3 (adjusted for, age, sex, BMI, smoking status, education level and employment status).

ES: Effect estimate

I-squared: variation in estimated effect attributable to heterogeneity

I-V: inverse-variance weighted (fixed effect model)

D+L: DerSimonian and Laird (random effect model)

Supplementary Figure S2

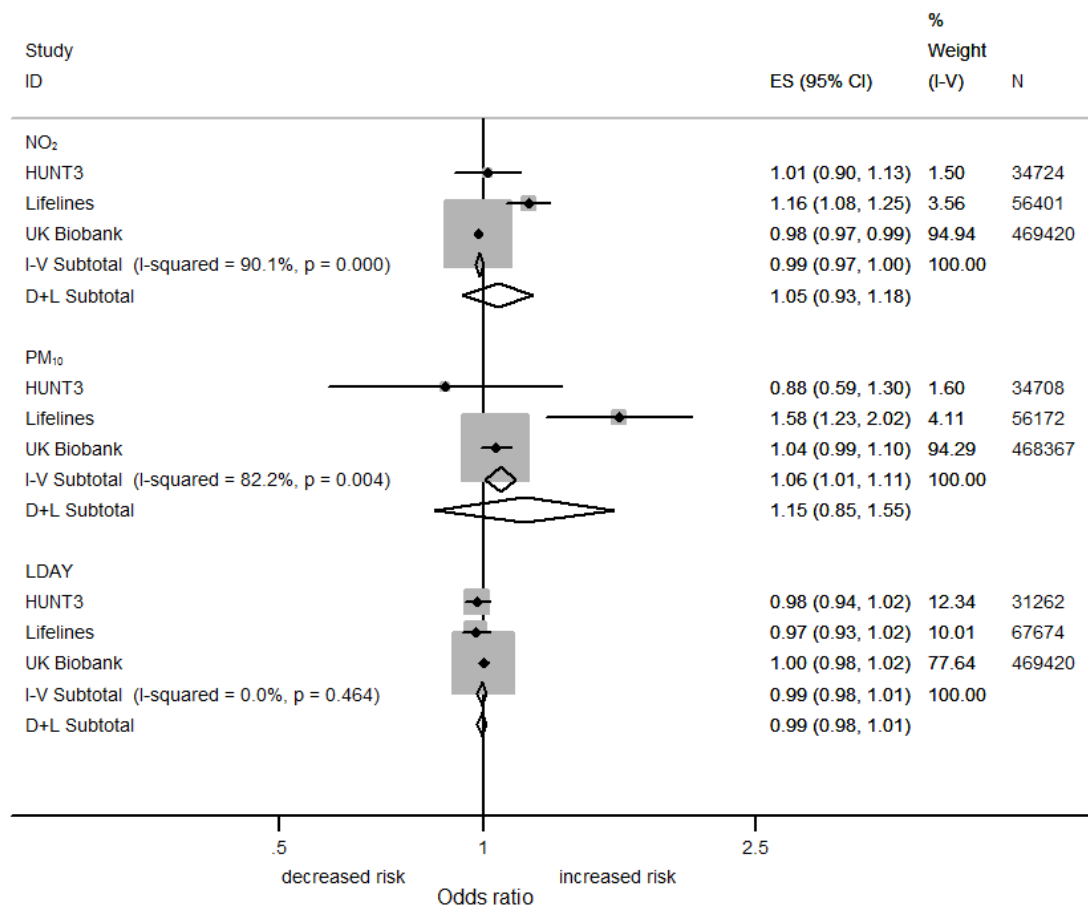

Supplementary Figure S2 Associations between pan-European LUR NO<sub>2</sub> (per 10 µg/m<sup>3</sup>), PM<sub>10</sub> (per 10 µg/m<sup>3</sup>), day-time noise (LDAY, per 5 dB(A)) and **current-asthma prevalence**: study-specific meta-analyses based on model 3 (adjusted for age, sex, BMI, smoking status, education level and employment status).

ES: Effect estimate

I-squared: variation in estimated effect attributable to heterogeneity

I-V: inverse-variance weighted (fixed effect model)

D+L: DerSimonian and Laird (random effect model)
